# Supplementary material for: Salmonella Control Programme of Pig Feeds Is Financially Beneficial in Finland
Source: PubMed Central journal article supplement (PMC6629760; doi:10.3389/fvets.2019.00200), 2019-07-09
Supplement: Presentation_1.pdf [file Presentation_1.pdf]

**Supplementary material for the article “*Salmonella* control programme of pig feeds is financially beneficial in Finland”**

Jarkko K. Niemi<sup>1</sup>, Katriina Heinola<sup>2</sup>, Maria Simola<sup>3</sup>, Pirkko Tuominen<sup>3</sup>,

<sup>1</sup> Bioeconomy and Environment, Natural Resources Institute Finland (Luke), Seinäjoki, Finland

<sup>2</sup> Bioeconomy and Environment, Natural Resources Institute Finland (Luke), Helsinki, Finland

<sup>3</sup> Risk Assessment Unit, Finnish Food Authority, Helsinki, Finland

Correspondence: [jarkko.niemi@luke.fi](mailto:jarkko.niemi@luke.fi)

Appendix 1. Parameters describing the prevalence of salmonella feed materials and feed imported into Finland (proportion of 25 ton lots of imported feed contaminated), and the prevalence of salmonella in feed materials and feed manufactured (proportion of 25 ton lots of feed or feed material) in Finland in the current control scenario.

|                                                                           | Mean                 | sd                   | 2.5 %                | 97.5 %               |
|---------------------------------------------------------------------------|----------------------|----------------------|----------------------|----------------------|
| <b>Imported feed or feed materials</b>                                    |                      |                      |                      |                      |
| Sunflower                                                                 | 0.001595             | 0.002282             | 0.000002             | 0.008090             |
| Whey                                                                      | 0.000133             | 0.000246             | 0.000000             | 0.000705             |
| Pea                                                                       | 0.005112             | 0.007815             | 0.000006             | 0.026330             |
| Oats                                                                      | 0.000093             | 0.000061             | 0.000015             | 0.000244             |
| Milk                                                                      | 0.001103             | 0.001603             | 0.000001             | 0.005626             |
| Barley                                                                    | 0.000062             | 0.000042             | 0.000010             | 0.000167             |
| Brewer's yeast                                                            | 0.001322             | 0.001886             | 0.000001             | 0.006714             |
| Bean                                                                      | 0.001713             | 0.002470             | 0.000001             | 0.008657             |
| Linen seed                                                                | 0.021370             | 0.030260             | 0.000019             | 0.107400             |
| Rank                                                                      | 0.000174             | 0.000383             | 0.000000             | 0.000929             |
| Rapeseed, domestic origin                                                 | 0.000239             | 0.000337             | 0.000000             | 0.001204             |
| Rapeseed, imported                                                        | 0.013670             | 0.002246             | 0.009862             | 0.018690             |
| Soybean                                                                   | 0.003319             | 0.002150             | 0.000534             | 0.008694             |
| Soybean, imported                                                         | 0.004425             | 0.001182             | 0.002465             | 0.007080             |
| Sugar beet chips                                                          | 0.000494             | 0.000709             | 0.000000             | 0.002522             |
| Sugar beet chips, imported                                                | 0.001764             | 0.001463             | 0.000123             | 0.005555             |
| Wheat                                                                     | 0.000091             | 0.000060             | 0.000015             | 0.000241             |
| Wheat bran                                                                | 0.006753             | 0.002395             | 0.002973             | 0.012250             |
| Complete feed for sows                                                    | 0.037750             | 0.054050             | 0.000032             | 0.192800             |
| Complete feed for fattening pigs                                          | 0.038370             | 0.053360             | 0.000038             | 0.189900             |
| <b>Feed materials and feed manufactured in Finland</b>                    |                      |                      |                      |                      |
| Industrial complete feed for sows                                         | $5.10 \cdot 10^{-6}$ | $7.38 \cdot 10^{-6}$ | $2.01 \cdot 10^{-7}$ | $2.81 \cdot 10^{-5}$ |
| Industrial complete feed for pigs                                         | $4.23 \cdot 10^{-6}$ | $6.13 \cdot 10^{-6}$ | $1.69 \cdot 10^{-7}$ | $2.32 \cdot 10^{-5}$ |
| Supplementary feed for sows                                               | $1.13 \cdot 10^{-5}$ | $1.65 \cdot 10^{-5}$ | $4.34 \cdot 10^{-7}$ | $6.24 \cdot 10^{-5}$ |
| Supplementary feed for fattening pigs                                     | $1.51 \cdot 10^{-5}$ | $2.17 \cdot 10^{-5}$ | $5.91 \cdot 10^{-7}$ | $8.31 \cdot 10^{-5}$ |
| Supplementary liquid feed                                                 | $6.36 \cdot 10^{-7}$ | $2.15 \cdot 10^{-6}$ | $6.36 \cdot 10^{-9}$ | $4.37 \cdot 10^{-6}$ |
| Feed prepared at the farm for liquid feeding (without supplementary feed) | $9.11 \cdot 10^{-5}$ | $4.54 \cdot 10^{-5}$ | $4.65 \cdot 10^{-5}$ | $1.92 \cdot 10^{-4}$ |
| Feed prepared at the farm for dry feeding (without supplementary feed)    | $6.38 \cdot 10^{-5}$ | $1.87 \cdot 10^{-5}$ | $3.71 \cdot 10^{-5}$ | $1.09 \cdot 10^{-4}$ |
| Imported complete feed for sows                                           | 0.01596              | 0.02280              | $1.37 \cdot 10^{-5}$ | 0.08153              |
| Imported complete feed for fattening pigs                                 | 0.01625              | 0.02265              | $1.62 \cdot 10^{-5}$ | 0.08042              |

Appendix 2. Parameters describing the prevalence of salmonella contamination in feed fed to pigs (proportion of 25 ton lots of feed contaminated) in the current control scenario<sup>1</sup>.

|                                                                               | Mean     | sd       | 2.5 %    | 97.5 %   |
|-------------------------------------------------------------------------------|----------|----------|----------|----------|
| Industrial complete feed for sows                                             | 0.001013 | 0.000213 | 0.000661 | 0.001488 |
| Industrial complete feed for pigs                                             | 0.000842 | 0.000176 | 0.000556 | 0.001243 |
| Liquid on-farm mixture with industrial complementary feeds for sows           | 0.000320 | 0.000119 | 0.000190 | 0.000576 |
| Liquid on-farm mixture with industrial complementary feeds for pigs           | 0.000361 | 0.000120 | 0.000228 | 0.000620 |
| Dry on-farm mixture with industrial complementary feeds for sows              | 0.000426 | 0.000981 | 0.000273 | 0.000644 |
| Dry on-farm mixture with industrial complementary feeds for pigs              | 0.000524 | 0.000102 | 0.000363 | 0.000752 |
| Liquid on-farm mixture with industrial liquid complementary feed for sows     | 0.000205 | 0.000122 | 0.000099 | 0.000463 |
| Liquid on-farm mixture with industrial liquid complementary feed for pigs     | 0.000205 | 0.000122 | 0.000099 | 0.000463 |
| Liquid farm mixture with industrial liquid feed (complementary <10%) for sows | 0.000209 | 0.000116 | 0.000104 | 0.000456 |
| Liquid farm mixture with industrial liquid feed (complementary <10%) for pigs | 0.000209 | 0.000012 | 0.000104 | 0.000456 |
| Dry on-farm mixture with industrial liquid complementary feed for sows        | 0.000150 | 0.000061 | 0.000083 | 0.000282 |
| Dry on-farm mixture with industrial liquid complementary feed for pigs        | 0.000150 | 0.000061 | 0.000083 | 0.000282 |
| Imported complete feed for sows                                               | 0.037750 | 0.054050 | 0.000032 | 0.192800 |
| Imported complete feed for pigs                                               | 0.038370 | 0.053360 | 0.000038 | 0.189900 |

<sup>1</sup> Parameter values in the table represent the true prevalence. Based on the data, apparent prevalence was estimated at 42% of the true prevalence. In addition, it was estimated that 11% of cases lead to the culling of the pigs due to *Salmonella* contamination.
